# Supplementary material
Source: PubMed Central journal article supplement (PMC2687075)
Supplement: NIHMS4373-supplement-S1.pdf [file NIHMS4373-supplement-S1.pdf]

## “Large recurrent microdeletions associated with schizophrenia“

### Subjects and ascertainment

#### Iceland

The Icelandic sample consists of 646 cases with schizophrenia and related psychoses and 32,442 controls. Patients and controls are all Icelandic and were recruited from all over Iceland. Diagnoses were assigned according to Research Diagnostic Criteria (RDC)<sup>1</sup> through the use of the lifetime version of the Schizophrenia and Affective Disorders Schedule (SADS-L)<sup>2</sup>. Of the 646 subjects, 619 were diagnosed with schizophrenia, 22 with schizoaffective disorder and five with unspecified functional psychosis.

The 32,442 Icelandic controls used for this study were recruited as a part of various genetic programs at deCODE and were not screened for psychiatric disorders. The individuals came from genetic programs in the following diseases (approximate number of participants in brackets): Abdominal Aortic Aneurism (400), Addiction (5400), Age-related Macular Degeneration (600), Alzheimer's Disease (700), Anxiety and Panic Disorder (1100), Asthma (1400), Attention Deficit Hyperactivity Disorder (500), Benign Prostatic Hyperplasia (900), Breast Cancer (1600), Chronic Obstructive Pulmonary Disease (900), Colon Cancer (1000), Coronary Artery Disease (4000), Deep Vein Thrombosis (1000), Dyslexia (700), Endometriosis (300), Enuresis (900), Obesity (800), Glaucoma (200), Hypertension (2400), Infectious Diseases (2500), Longevity

(1600), Lung Cancer (300), Melanoma (500), Migraine (1300), Osteoarthritis (2600), Osteoporosis (3000), Polycystic Ovary Syndrome (1400), Peripheral Artery Disease (1500), Preeclampsia (800), Prostate Cancer (1400), Psoriasis (900), Restless Legs Syndrome (500), Rheumatoid Arthritis (700), Stroke (1900), Essential Tremor (400), Type II Diabetes (1500), Autism (299) and a set of population controls (900). Because some of the individuals used as controls were participants in more than one program, the numbers of participants in individual programs sum to more than 32,442.

### Finland

The Finnish sample consists of 191 schizophrenics and 200 regionally selected controls that had no medical history of schizophrenia. Approximately half of the sample originated from an internal isolate of Finland having a 3.0 % age corrected lifetime risk for schizophrenia compared to the 1.1% of the general population. Two independent psychiatrists blind to family structures made a consensus diagnosis to give best-estimate lifetime diagnoses according to the criteria of Diagnostic and Statistical Manual of Mental Disorders, 4th edition (DSM-IV)<sup>3</sup>.

### Scotland

The Scottish sample is comprised of 211 schizophrenia cases and 229 controls used in phase I and a replication cohort of 451 schizophrenia cases and 441 controls. All participants self-identified as born in the British Isles (95% in Scotland). All cases met DSM-IV and an ICD-10 criteria for schizophrenia. Diagnosis was made by OPCRIT. Controls were volunteers recruited through general practices in Scotland. Practice lists were screened for potentially suitable volunteers by age and sex and by exclusion of subjects with major mental illness or use of antipsychotic medication.

### UK

Samples from the UK subjects (N=105) were drawn from the Maudsley Family Study of psychosis<sup>4</sup>, the psychosis twin study<sup>5</sup>, and the genetics and psychosis (GAP) study. All controls were unrelated European Caucasians (N=96). All patients were interviewed with the Schedule for Affective Disorders and Schizophrenia Lifetime Version (SADS-L; Endicott and Spitzer, 1978) which was supplemented with information from case notes and other relatives to assign a lifetime DSM-IV diagnosis of schizophrenia. The GAP cases were diagnosed using the Item Group Checklist (IGC) of the Schedule for Clinical Assessment in Neuropsychiatry (SCAN)<sup>6</sup>. Only patients with an ICD-10 research diagnosis of schizophrenia were finally included as cases. Patients were receiving a variety of antipsychotic medications at the time of assessment. The study received approval from the Ethics Committee of the South London and Maudsley Trust and after complete description of the study to the participants, written informed consent was obtained.

### Italy

Diagnosis of the 85 Italian subjects was identical to that for the GAP sample (See UK subjects). Patients with a diagnosis of psychotic disorders (ICD-10, F20-F25) attending the South Verona CMHS were identified from the South Verona Psychiatric Case Register, and cases with ICD-10 research diagnosis of schizophrenia were finally included. The controls (N=91) were unrelated volunteers randomly selected from the general population of South Verona. The study received ethical approval and after complete description of the study to the participants, written informed consent was obtained.

### Germany - Munich

The Munich sample consisted of 615 cases and 614 controls, all Caucasian. Cases diagnosed with DSM-IV schizophrenia were ascertained from the Munich area in Germany. Samples from 195 cases and 192 controls were typed for phase I and the remaining samples used in the replication phase. Detailed medical and psychiatric histories were collected, including a clinical interview using the Structured Clinical Interview for Axis I DSM-IV Disorders (SCID)<sup>7</sup>. Exclusion criteria included a history of head injury or neurological diseases. The controls were unrelated volunteers randomly selected from the general population of Munich.

### Germany - Bonn

The Bonn sample is comprised of 491 patients and 875 controls. Patients were recruited from consecutive hospital admissions and were all of German descent. In patients, lifetime best estimate diagnoses according to DSM-IV criteria were based on multiple sources of information including structured interview with the SCID<sup>7</sup> or SADS-L (Endicott and Spitzer, 1978), the OPCRIT<sup>8</sup>, medical records, and the family history. Best estimate diagnoses were obtained from at least two experienced psychiatrists/psychologists. Controls were derived from two German population-based cohorts, PopGen (N=492) and Heinz Nixdorf Recall (N=383). Ethical approval was obtained from the local Ethics Committees. All participants gave written informed consent.

### The Netherlands – Utrecht/ Nijmegen

The Dutch sample consisted of 806 patients and 706 controls from Utrecht and on additional 3,333 control individuals from Nijmegen in the Netherlands. Inpatients and outpatients were recruited from different psychiatric hospitals and institutions

throughout the Netherlands, coordinated via academic hospitals in Amsterdam, Groningen, Maastricht and Utrecht. Detailed medical and psychiatric histories were collected, including the Comprehensive Assessment of Symptoms and History (CASH), an instrument for assessing diagnosis and psychopathology. To exclude related patients and controls, all subjects were fingerprinted (Illumina DNA panel, 400 SNPs). Only patients with a DSM-IV diagnosis of schizophrenia were included as cases. All patients and controls were of Dutch descent, with at least three out of four grandparents of Dutch ancestry. The controls were volunteers and were free of any psychiatric history. Ethical approval was obtained from the local Ethics Committees. All participants gave written informed consent.

The additional controls consisted of 3,333 samples, collected by the Radboud University Nijmegen Medical Centre (RUNMC) for genetic studies (cancer and control samples). All 3,333 participants used in the present study are of self-reported European descent. The study protocol was approved by the Institutional Review Board of Radboud University and all study subjects gave written informed consent.

### Denmark

The Danish sample included 442 patients who have been recruited to Danish Psychiatric Biobank from the psychiatric departments at the six hospitals in the Copenhagen region. All patients had been clinically diagnosed with schizophrenia according to ICD-10 (F20 and F25) without ever having received a diagnosis of mania or bipolar illness (F30-31). An experienced research- and consultant psychiatrist verified high reliability of the clinical diagnoses, using OPCRIT. Of the 442 patients 30 were schizoaffective and six were diagnosed with persistent delusional disorder. Nine hundred ninety four healthy control subjects were recruited through the Danish Blood Donor Corps in the Copenhagen area. Apparent behavioral abnormality was an exclusion criterion and all

individuals stated that they felt completely healthy and were able to discuss health related issues with a physician. An additional 445 population control samples from the Copenhagen area were recruited by the Danish Headache Center. The Danish Scientific Committees and the Danish Data Protection Agency approved the study and all the patients had given written informed consent prior to inclusion into the project.

### Norway

The Norwegian sample included 237 patients who had been recruited to the TOP study from all the psychiatric hospitals in the Oslo area. The patients were diagnosed according to Structural Clinical Interview for DSM-IV (SCID) as schizophrenia (N=153) schizoaffective (N=34), schizophreniform disorder (N=10), psychosis NOS (N=44) and delusional disorder (N=6). The healthy control subjects (N=272) were randomly selected from statistical records of persons from the same catchment area as the patient groups. Only subjects born in Norway, all of Caucasian origin, were contacted by letter and invited to participate. All subjects have given written informed consent prior to inclusion into the project and the Norwegian Scientific-Ethical Committee and the Norwegian Data Protection Agency approved the study.

### China

The Chinese sample was from Sichuan Province, Southwest China. Cases (N=438) were ascertained from West China Hospital, and were interviewed by a psychiatrist using the SCID. Diagnosis of schizophrenia was assigned on the basis of the interview and medical records according to DSM-IV criteria. Patients were excluded if they had a history of neurological disorders or head injury, or reported intellectual disability. The unrelated controls (N=463) were volunteers from the local population and were free of

major mental illness. Ethical approval for the project was granted by West China Hospital and written informed consent was obtained from all participants.

The phase I samples were all typed at deCODE using the HumanHap300 chip. The additional samples (phase II) were typed at Duke University (HumanHap300 or HumanHap550), Bonn University (HumanHap550), UCLA (HumanHap550) and Expression Analysis, Durham (Affymetrix GeneChip(r) GenomeWide SNP 6.0 array) and at deCODE (Dosage analysis, Taqman assays). All subjects identified with a CNV using the Taqman assays were confirmed by typing the respective samples on HumanCNV370 chip. A summary of the samples used in the various stages of the study can be found in Supplementary Table 1.

**Supplementary Table 1. Summary of the samples used in the various stages of the study**

| Site             | CNV identification |       | Phase I |       | Phase II |      |
|------------------|--------------------|-------|---------|-------|----------|------|
|                  | Aff                | Ctrl  | Aff     | Ctrl  | Aff      | Ctrl |
| Iceland          | -                  | 17596 | 646     | 32442 | -        | -    |
| Scotland         | -                  | -     | 211     | 229   | 451      | 441  |
| Germany (Munich) | -                  | -     | 195     | 192   | 420      | 422  |
| Germany (Bonn)   | -                  | -     | -       | -     | 491      | 875  |
| UK               | -                  | -     | 105     | 96    | -        | -    |
| The Netherlands  | -                  | -     | -       | -     | 806      | 4039 |
| Italy            | -                  | -     | 85      | 91    | -        | -    |
| Finland          | -                  | -     | 191     | 200   | -        | -    |
| Denmark          | -                  | -     | -       | -     | 442      | 1439 |
| Norway           | -                  | -     | -       | -     | 237      | 272  |
| China            | -                  | -     | -       | -     | 438      | 463  |

For the CNV identification stage, Icelandic trios and parent-offspring pairs, all unaffected with schizophrenia, were used. Phase I included affected and control samples from six research groups - Iceland, Germany (Munich), UK, Italy and Finland. For phase II, additional samples from two sites of the previous six - Scotland and Germany (Munich) – were included (no overlap) as well as data from five additional groups – Germany (Bonn), The Netherlands, Denmark, Norway and China. The Icelandic trios and parent-offspring pairs used for CNV identification were included in the Icelandic controls used in phase I. There were no duplicate samples in the combined phase I and phase II set.

### Fluorescent in situ hybridization ( FISH )

FISH was carried out at deCODE genetics. Interphases were harvested according to standard cytogenetic methods from human B-lymphoblastoid cell lines (EBV transformed) from six individuals, based on information from the Taqman dosage analysis done previously. We used two BAC probes, RP11-431G14 (covers PRK gene on chromosome 1q21) labelled with biotin (green) and an anchor BAC, RP11-458I7 labelled with digoxigenin (red). The BAC probes were labelled with either Biotin-16-dUTP or Digoxigenin-11-dUTP utilizing a nick translation kit (Roche Applied Science).

The hybridization procedure followed a standard protocol. In short, the probes were denatured at 72°C for 5 minutes and pre-annealed at 37°C for 15 minutes, before being applied to denatured slides. The slides were denatured in 70% formamide at 70°C for 2 minutes, quenched in 2xSSC at 4°C and then dehydrated in an ethanol series. Following an overnight hybridization the slides were washed in 50% formamide at 42°C for 10 minutes and 2xSSC at 42°C for 5 minutes. The biotinylated probe was detected with avidin/streptavidin FITC (Vector Lab) followed by a layer of biotinylated Anti Avidin (Vector Lab) and again one layer of avidin FITC was added. The digoxigenin probe was detected using Sheep anti Digoxigenin Rhodamine (Roche Applied science) followed by a layer of Donkey anti Sheep Texas red (Jackson Immuno Research). After detection the interphases were counter-stained with  $9 \times 10^{-3} \mu\text{g}$  4',6-Diamidino-2-phenylindole Dihydrochloride:Hydrate (DAPI) (Sigma) in AF1 mounting medium (Citifluor). The digital imaging was done using a Zeiss Axioplan 2 microscope with Asiocam MRm Zeiss camera and automatic Scanning System Metafer software from Metasystems.



### **Inheritance of the 1q21.1, 15q11.2 and 15q13.3 deletions in Iceland – evidence for negative selection**

Apart from association to schizophrenia, the deletions at 1q21.1, 15q11.2 and 15q13.3 also otherwise exhibited a pattern of negative selection. In the 33,088 Icelanders (646 schizophrenia patients and 32,442 controls) who are CNV typed, nine carry the deletion on 1q21.1, 62 carry the deletion on 15q11.2 and eight carry the deletion on 15q13.3. But not all of these cases resulted from ‘first-generation’ *de novo* events, i.e. some cases inherited the deletions from their parents. Specifically, by examining the haplotype (sequence of SNPs) background of the deletions and the known familial relationship between the carriers, we deduced that the nine 1q21.1 deletions correspond to six independent mutation/deletion events, the eight 15q13.3 deletions correspond to six independent mutation/deletion events and the 62 15q11.2 deletions correspond to approximately 32 separate events (it is noted that the 15q11.2 deletions in the four Icelandic schizophrenia cases correspond to four separate events, which are shared by a few of the controls). Two conclusions could be drawn from these observations. Firstly, carriers of these deletions are not infertile and, moreover, can pass on the deletion to their children. However, the probability that the carriers pass on the deletion to a child appears to be substantially lower than that under a model of neutrality and fecundity of carriers therefore reduced. All three deletions, particularly the 15q11.2, occurred rather frequently as a *de novo* event. Assuming that the deletions do not repair themselves (or only do so with very low probability) during successive meioses, being neutral, the deletions would be expected to have a much higher frequency in the population than observed. Consider the 15q11.2 deletion. When we study the carriers pair-wise, we find that if two carriers are separated by six meioses (second cousins) or less, their deletions are very likely to result from the same deletion event. For example, if two cousins both carry the deletion, they probably both inherited it from a common grandparent who is also a carrier. However, for two carriers that are separated by more

than six meioses, it is nearly always that the deletions they carry are results from two separate deletion events. This implies that the deletions that we observe in carriers, if not first generation *de novo*, would only go back a few generations. If we assume that each deletion carried could be traced back on average five generations, the 62 carriers observed out of 33,088 would correspond to an estimated mutation/deletion rate of  $62/(5 \times 33088 \times 2)$  (notice that the factor 2 comes in because a person carries two chromosomes), or about 1.9 events in 10,000. This is slightly higher, but not inconsistent, with the 1 in 9878 transmissions that we directly observed. Suppose we assume a mutation rate of 1 in 10,000. Notice that the chromosome a person carried would include all mutations that happened in its history. Even if we consider only the past 30 meioses (or tracing back to about 900 years ago), under a neutral model, the carrier frequency of 15q11.2 in the population would be expected to be around  $30 \times (1/10,000) \times 2 = 0.006$ , or about 198 carriers in 33088 individuals examined. This is substantially higher than the 62 carriers we actually observed.

We emphasize that the analysis described above is only meant to be descriptive. More rigorous investigation is needed to fully understand the selection pressure on the 1q21.1, 15q11.2 and 15q13.3 deletions. Given that the deletions are associated with schizophrenia patients, who are known to have fewer children than the general population, a pattern of negative selection might be expected. However, further negative selection pressure could result from reduced fecundity of carriers due to other phenotypes, and also transmission disequilibrium from carrier to child, i.e. the normal chromosome has a higher probability to be passed on than the chromosome with the deletion.

## Supplementary Figures

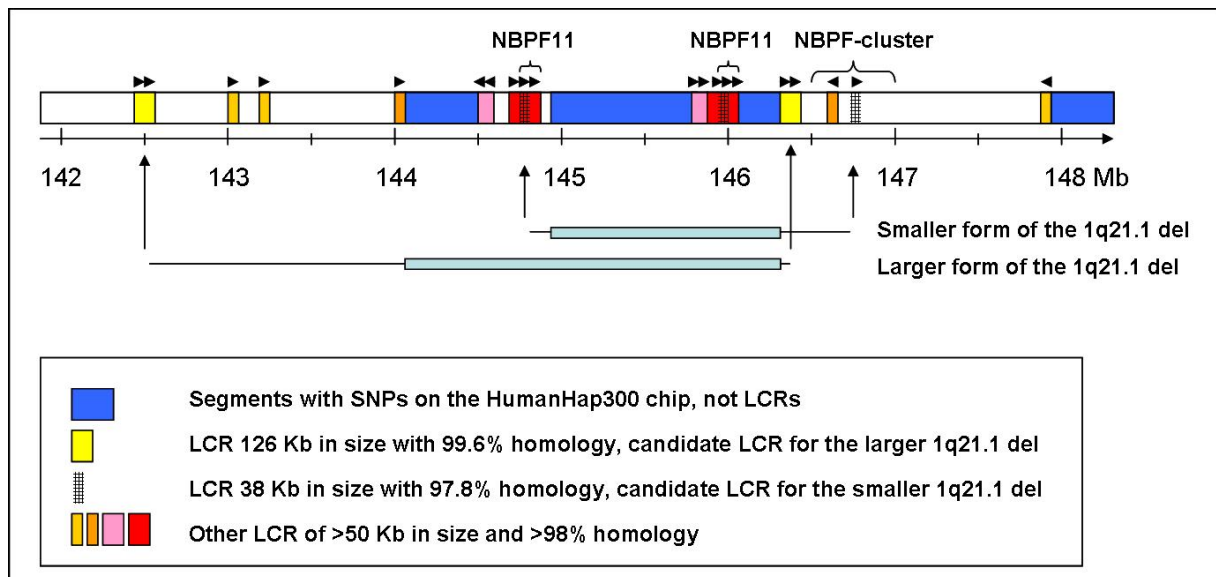

**Supplementary Figure 1.** Genomic architecture of the 1q21.1 deletions. Many large LCR with high homology are found at the 1q21.1 locus. LCR marked yellow (large arrows) on the picture may mediate NAHR accounting for the larger form of the 1q21.1 deletion. There are also many smaller repeats, 1,000-10,000 bp (not shown on the figure) that potentially could mediate the formation of the deletion. A smaller repeat marked in gray in the figure (smaller arrows) may assist NAHR, accounting for the smaller form of the deletion. Again, for this form of the deletion there are other smaller LCR that potentially could assist with the formation of the deletion (not shown on the figure). The NBPF11 protein (hypothetical protein LOC200030) is duplicated with high sequence homology. Segments marked in blue represent region containing SNPs on the Illumina HumanHap300 chip. Note that there are no SNPs on 1q on the Illumina HumanHap300 chip centromeric to the larger form of the 1q21.1 deletion. Thus, exact size of the larger form of the deletion is not known, the minimum size is 2.19 Mb. Markers on the p-arm are not deleted in the four cases or the control with the larger form of the 1q21.1 deletion.

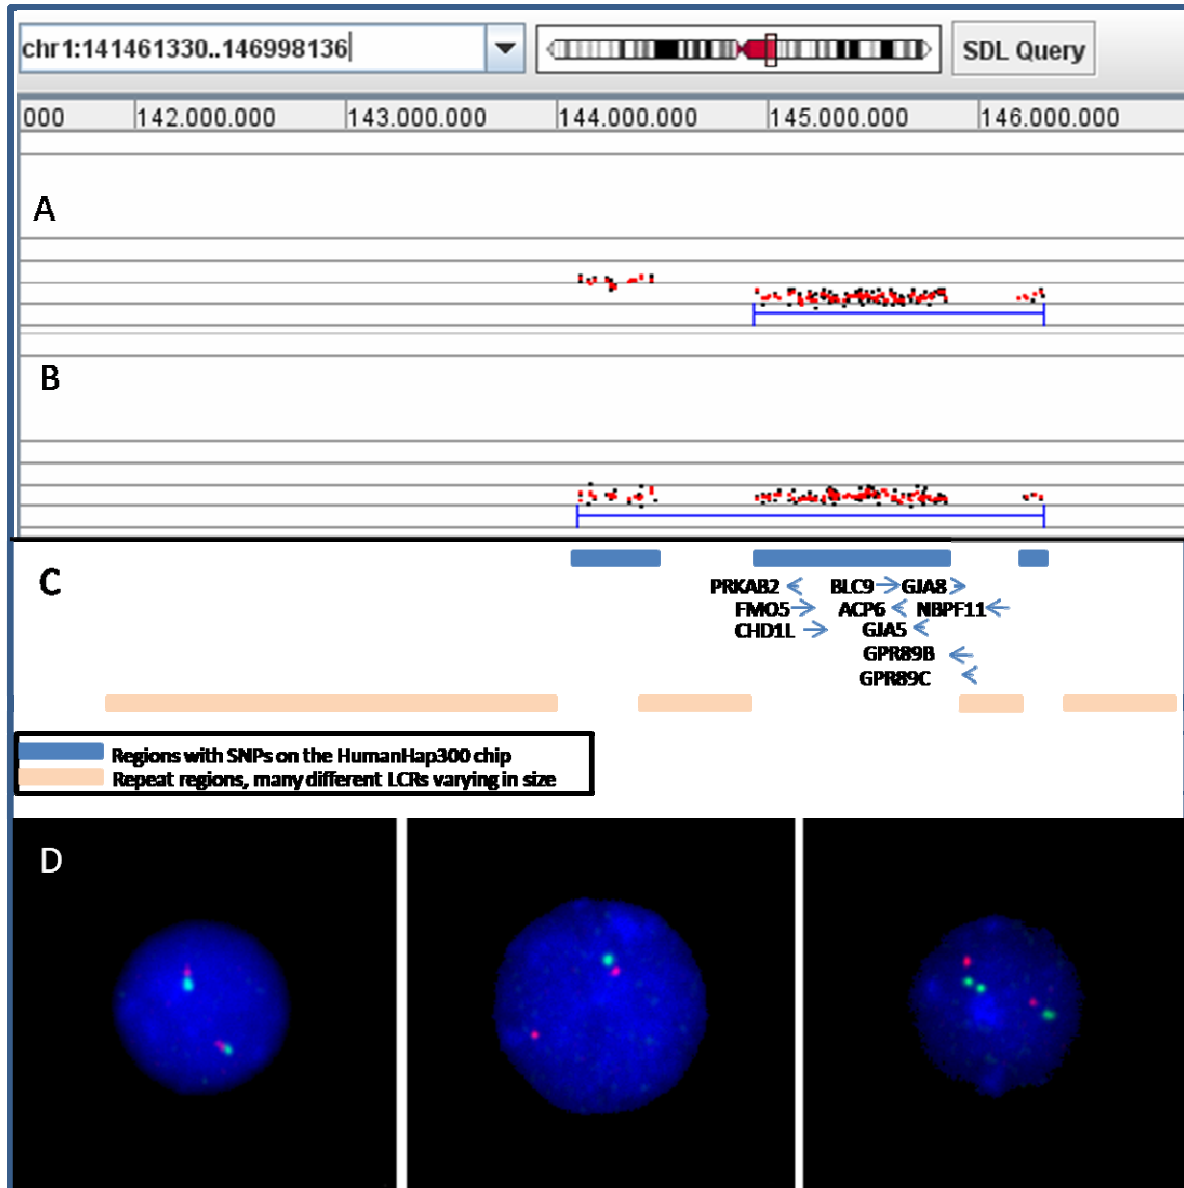

**Supplementary Figure 2.** A) DosageMiner output showing the shorter form of the 1q21 deletion (marked in blue). Ninety-nine SNPs on the HumanHap300 chip are affected by the deletion which spans 1.38 Mb. B) DosageMiner output showing the larger form of the 1q21.1 deletion (marked in blue). C) Shows affected genes by both deletions (Coordinates are based on Build 36 of the human genome and positions of genes derived from the UCSC genome browser). LCR flank both deletions (**Supplementary Figure 1**). D) Analysis of the 1q21.1 deletion with fluorescence in situ hybridization (FISH). Two BAC probes, RP11-431G14 (cover the *PRK* gene on chromosome 1q21) labeled with biotin (green) and an anchor BAC, RP11-458I7 labeled with digoxigenin (red) were used as probes for FISH analysis. A cell from a normal control (left) in interphase shows normal FISH signals, one red probe and one green probe per chromosome. A cell from a schizophrenia patient (center) with the 1q21.1 deletion shows aberrant FISH signal, the green signal is missing for one of the chromosomes. A cell from a schizophrenia patient with the 1q21.1 region duplicated (right), two green signals are seen for one of the two chromosomes.

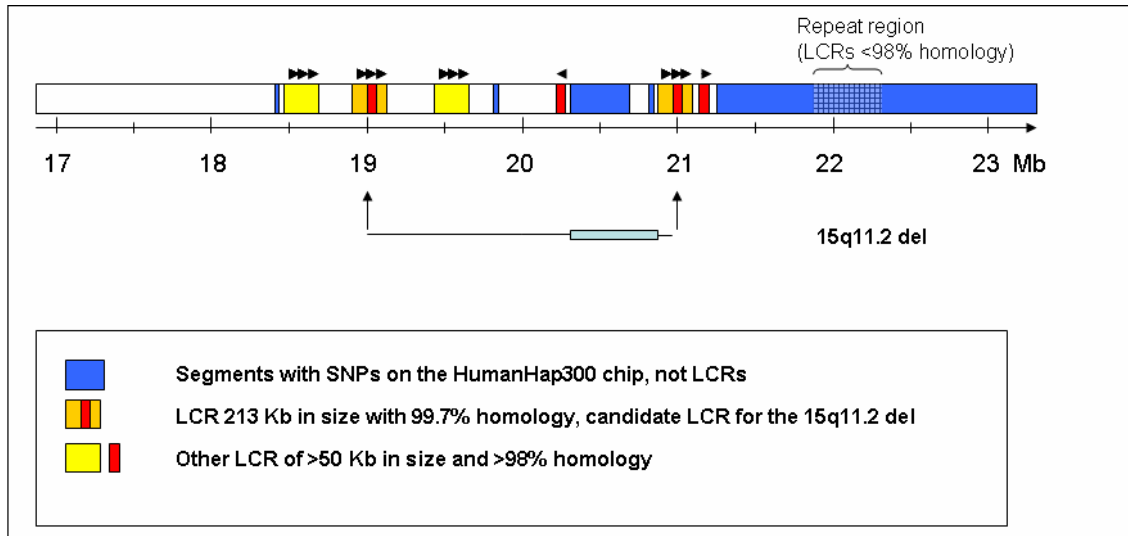

**Supplementary Figure 3.** A) LCRs flanking the deletion at 15q11.2. Several LCR at this locus can mediate the formation of the deletion. The light blue bar shows the minimum size of the deletion, and vertical arrows point to the regions with longest homologous sequences on both sides of the deletion, harbouring possible breakpoints. Coordinates are in line with Build 36 of the human genome.

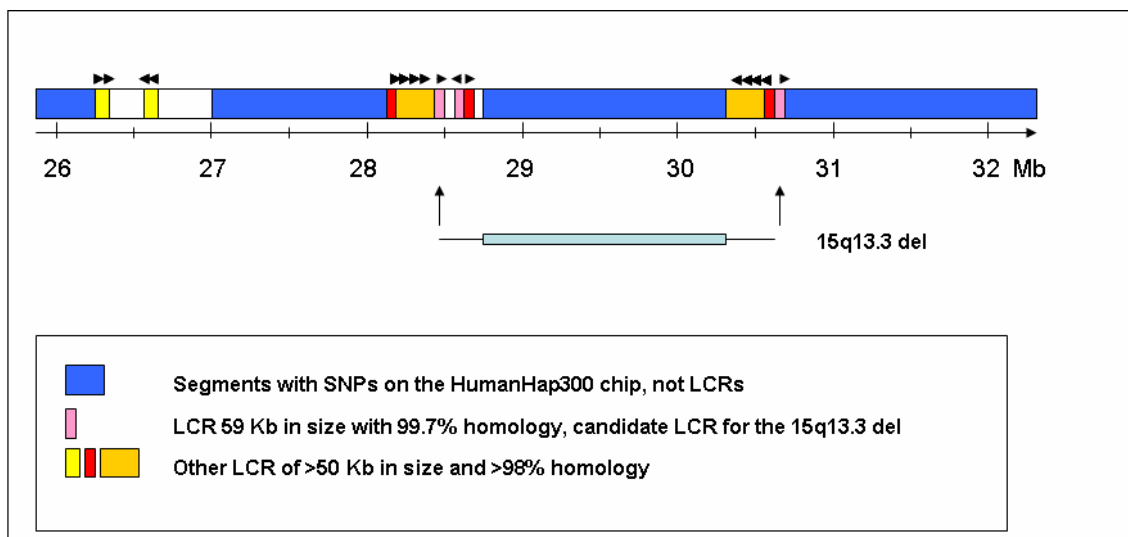

**Supplementary Figure 4.** A) LCRs flanking the deletion at 15q13.3 It is not clear which LCR might mediating the formation of the recurrent deletion. Light blue bar shows the minimum size of the deletion, and vertical arrows point to the only high homology sequence with same orientation on both sides of the deletion in the UCSC human genome reference sequence. Coordinates are in line with Build 36 of the human genome.

**Supplementary Table 2. Low copy repeats flanking *de novo* CNVs.**

| Build 36                   | CNV | Carriers found in Phase I | Number of flanking LCRs |          |          | Reference if present in CNV databases                        |
|----------------------------|-----|---------------------------|-------------------------|----------|----------|--------------------------------------------------------------|
|                            |     |                           | Distal                  | Proximal | homology |                                                              |
| chr1:144943150..146293282  | del | 8                         | >5                      | >5       | many     |                                                              |
| chr1:144943150..146293282  | dup | 12                        | >5                      | >5       | many     |                                                              |
| chr1:241675290..241777030  | del | 1                         | -                       | >5       | many     |                                                              |
| chr1:66487172..66981676    | del | 2                         | -                       | -        |          |                                                              |
| chr2:19443..11594900       | dup | 1                         | -                       | -        |          |                                                              |
| chr2:197605805..204072966  | dup | 1                         | -                       | -        |          |                                                              |
| chr2:198783049..199060613  | del | 1                         | -                       | -        |          |                                                              |
| chr2:239980943..242692820  | del | 1                         | -                       | 1        | 99.30%   |                                                              |
| chr2:50947040..51164471    | del | 1                         | -                       | -        |          |                                                              |
| chr2:95514686..97033113    | del | 1                         | >5                      | -        | many     |                                                              |
| chr3:174806420..176937369  | del | 1                         | -                       | -        |          |                                                              |
| chr3:197326041..197704191  | del | 1                         | >5                      | >5       | many     | lafrate/Tuzun:196918333-198862488                            |
| chr3:71223511..71819797    | dup | 1                         | -                       | -        |          |                                                              |
| chr3:95019980..99373057    | del | 1                         | -                       | -        |          |                                                              |
| chr3:97879021..101883423   | del | 1                         | -                       | -        |          |                                                              |
| chr4:151856718..151884547  | del | 4                         | -                       | -        |          |                                                              |
| chr5:34603067..34668956    | del | 1                         | >5                      | -        | many     |                                                              |
| chr5:58116787..72845587    | del | 1                         | -                       | -        |          |                                                              |
| chr6:162767020..162943840  | del | 35                        | -                       | -        |          | Redon: 162760913-163153251                                   |
| chr6:16699739..16803452    | del | 1                         | -                       | -        |          |                                                              |
| chr7:146077700..147445123  | del | 1                         | 4                       | -        | 98%      |                                                              |
| chr7:149081..295765        | del | 1                         | -                       | -        |          | Redon: 106472-298664                                         |
| chr7:15609872..16251148    | dup | 1                         | -                       | -        |          |                                                              |
| chr7:157553706..158812247  | del | 1                         | -                       | -        |          |                                                              |
| chr7:5050267..5190933      | del | 1                         | -                       | 2        | 99.1%    |                                                              |
| chr7:5229720..5653268      | dup | 1                         | -                       | 2        | 99.1%    | lafrate: 5431460-5671684                                     |
| chr7:57212608..57659300    | dup | 74                        | >5                      | >5       | many     |                                                              |
| chr7:72388281..73777987    | del | 1                         | >5                      | >5       | many     |                                                              |
| chr7:83887393..85199723    | del | 1                         | -                       | -        |          |                                                              |
| chr8:3931576..4252805      | del | 1                         | 2                       | -        | 98.7     | lafrate:3586932-5909600 & 3611006-4928252 & 3671288-5942813  |
| chr9:194201..5739305       | del | 1                         | >5                      | -        |          |                                                              |
| chr10:67880428..68013385   | del | 1                         | -                       | -        |          |                                                              |
| chr10:7917790..8021528     | del | 2                         | -                       | -        |          |                                                              |
| chr10:81567594..81962366   | del | 3                         | >5                      | >5       | many     |                                                              |
| chr11:128201807..134435899 | del | 1                         | -                       | -        |          |                                                              |
| chr11:84603291..85465999   | dup | 1                         | -                       | -        |          |                                                              |
| chr12:115338506..115813464 | dup | 1                         | -                       | -        |          |                                                              |
| chr12:98512325..98707024   | del | 1                         | -                       | -        |          |                                                              |
| chr15:20306549..20777695   | del | 58                        | >5                      | >5       | many     | Redon/lafrate: 18263733-21365850 & lafrate:18403666-21241985 |
| chr15:20306549..20777695   | dup | 128                       | >5                      | >5       | many     | Redon/lafrate: 18263733-21365850 & lafrate:18403666-21241985 |

|                          |     |    |    |    |      |                                                                                                                                               |
|--------------------------|-----|----|----|----|------|-----------------------------------------------------------------------------------------------------------------------------------------------|
| chr15:20306549..26208861 | dup | 6  | >5 | >5 | many |                                                                                                                                               |
| chr15:28723577..30302218 | del | 7  | >5 | >5 | many |                                                                                                                                               |
| chr15:47635303..47679448 | del | 94 | -  | -  |      |                                                                                                                                               |
| chr16:15032942..16197033 | del | 10 | >5 | >5 | many |                                                                                                                                               |
|                          |     |    |    |    |      | lafrate:21241957-21833734 & Tuzun:21485317-22595351 & 21500522-22586272 & Redon:21212773-21856623 Tuzun:21485317-22595351 & 21500522-22586272 |
| chr16:21515973..21647775 | del | 31 | >5 | >5 | many |                                                                                                                                               |
| chr16:21856623..22331199 | del | 17 | >5 | >5 | many |                                                                                                                                               |
| chr16:29563365..30085308 | del | 11 | >5 | >5 | many |                                                                                                                                               |
| chr16:77757915..78273834 | del | 1  | -  | -  |      |                                                                                                                                               |
| chr16:81429793..81491808 | del | 1  | -  | -  |      |                                                                                                                                               |
|                          |     |    |    |    |      | Redon: 86986674-87137417                                                                                                                      |
| chr16:86921984..87097884 | del | 1  | -  | -  |      |                                                                                                                                               |
| chr17:14041754..15390352 | del | 5  | 2  | >5 | many |                                                                                                                                               |
| chr17:15390352..20231611 | del | 1  | >5 | >5 | many |                                                                                                                                               |
| chr17:31889664..33323543 | dup | 11 | >5 | >5 | many |                                                                                                                                               |
| chr17:796976..1155912    | del | 1  | 2  | 4  | many |                                                                                                                                               |
| chr17:9071043..9382978   | del | 1  | -  | -  |      |                                                                                                                                               |
| chr18:75020837..75408356 | dup | 1  | -  | -  |      |                                                                                                                                               |
| chr19:20844764..20914290 | dup | 6  | 2  | 1  | 98%  |                                                                                                                                               |
| chr19:267040..1822341    | del | 1  | -  | -  |      |                                                                                                                                               |
| chr19:54264641..54560863 | del | 1  | >5 | >5 | many |                                                                                                                                               |
| chr20:14610721..14884935 | del | 1  | -  | -  |      |                                                                                                                                               |
| chr20:14849776..15034277 | del | 22 | -  | -  |      |                                                                                                                                               |
| chr20:14874333..15174767 | del | 5  | -  | -  |      |                                                                                                                                               |
| chr21:34846103..35391627 | dup | 1  | -  | -  |      |                                                                                                                                               |
|                          |     |    |    |    |      | lafrate: 16931796-17441713 & 17011366-17417535                                                                                                |
| chr22:17257787..17373128 | del | 56 | >5 | >5 | many |                                                                                                                                               |
| chr22:19063495..19792353 | del | 3  | >5 | >5 | many |                                                                                                                                               |
|                          |     |    |    |    |      | McCarroll: 21032391-21564096 & lafrate: 20487965-21442582 & 20759608-21442582 & 21032391-21564096                                             |
| chr22:21063401..21394287 | del | 3  | >5 | >5 | many |                                                                                                                                               |

Of the 66 identified CNVs tested for association 23 are flanked by large repetitive segments (distal or proximal) likely to harbor LCRs. Those flanked by repetitive segments are in most cases seen in more of the 32,442 controls tested. Reference is given where we have found the CNV in a CNV database. Coordinates are based on Build 36 of the human genome.

lafrate: BAC microarray analysis of 236 putative CNP regions in 55 individuals<sup>9</sup>.

Tuzun: Fosmid mapping paired-end sequences from a human fosmid DNA library (297 ISV sites)<sup>10</sup>. Redon: SNP and BAC microarray analysis of HapMap data phase II (270 Individuals)<sup>11</sup>.

Locke: CNP in duplication-rich regions using array CGH in the HapMap populations (269 individuals)<sup>12</sup>. McCarroll: Deletions from analysis of SNP genotypes, using the HapMap Phase I data, release 16a. (269 individuals)<sup>13</sup>.

Supplementary Table 3

| Build36                    | Boundaries of CNV |            | Iceland        |                   | Scotland       |                 | Germany        |                 | UK             |                | Italy         |                | Finland        |                 | Combined             |             |
|----------------------------|-------------------|------------|----------------|-------------------|----------------|-----------------|----------------|-----------------|----------------|----------------|---------------|----------------|----------------|-----------------|----------------------|-------------|
|                            | First SNP         | Last SNP   | Aff<br>(N=648) | Ctrl<br>(N=32442) | Aff<br>(N=211) | Ctrl<br>(N=229) | Aff<br>(N=195) | Ctrl<br>(N=192) | Aff<br>(N=108) | Ctrl<br>(N=92) | Aff<br>(N=85) | Ctrl<br>(N=91) | Aff<br>(N=191) | Ctrl<br>(N=200) | OR                   | P-value     |
| chr1:144943150..146293282  | del               | rs6656361  | rs2932454      | <b>1</b>          | <b>8</b>       | <b>2</b>        | 0              | <b>1</b>        | 0              | 0              | 0             | 0              | 0              | 0               | <b>8.7 (1.0-50)</b>  | <b>0.02</b> |
| chr1:144943150..146293282  | dupl              | rs6656361  | rs2932454      | <b>1</b>          | <b>12</b>      | 0               | 0              | 0               | 0              | 0              | 0             | 0              | 0              | <b>1</b>        | <b>na.</b>           | <b>ns.</b>  |
| chr1:241675290..241777030  | del               | rs6702982  | rs1121276      | 0                 | <b>1</b>       | 0               | 0              | 0               | 0              | 0              | 0             | 0              | 0              | 0               | na.                  | na.         |
| chr1:66487172..66981676    | del               | rs6664618  | rs604737       | 0                 | <b>2</b>       | 0               | 0              | 0               | 0              | 0              | 0             | 0              | 0              | 0               | na.                  | na.         |
| chr10:67880428..68013385   | del               | rs1911314  | rs2631221      | 0                 | <b>1</b>       | 0               | 0              | 0               | 0              | 0              | 0             | 0              | 0              | 0               | na.                  | na.         |
| chr10:7917790..8021528     | del               | rs1244502  | rs187821       | 0                 | <b>2</b>       | 0               | 0              | 0               | 0              | 0              | 0             | 0              | 0              | 0               | na.                  | na.         |
| chr10:81567594..81962366   | del               | rs10885307 | rs3000954      | 0                 | <b>3</b>       | 0               | 0              | 0               | 0              | 0              | 0             | <b>1</b>       | 0              | 0               | na.                  | na.         |
| chr11:128201807..134435899 | del               | rs588407   | rs4540845      | 0                 | <b>1</b>       | 0               | 0              | 0               | 0              | 0              | 0             | 0              | 0              | 0               | na.                  | na.         |
| chr11:84603291..85465999   | dupl              | rs938727   | rs541458       | 0                 | <b>1</b>       | 0               | 0              | 0               | 0              | 0              | 0             | 0              | 0              | 0               | na.                  | na.         |
| chr12:115338506..115813464 | dupl              | rs1732325  | rs4767470      | 0                 | <b>1</b>       | 0               | 0              | 0               | 0              | 0              | 0             | 0              | 0              | 0               | na.                  | na.         |
| chr12:98512325..98707024   | del               | rs3851626  | rs11110041     | 0                 | <b>1</b>       | 0               | 0              | 0               | 0              | 0              | 0             | 0              | 0              | 0               | na.                  | na.         |
| chr15:20306549..20777695   | del               | rs8040193  | rs3883043      | <b>4</b>          | <b>58</b>      | <b>2</b>        | 0              | <b>3</b>        | 0              | <b>1</b>       | 0             | 0              | 0              | <b>1</b>        | <b>3.2 (1.1-8.0)</b> | <b>0.02</b> |
| chr15:20306549..20777695   | dupl              | rs8040193  | rs3883043      | <b>2</b>          | <b>128</b>     | 0               | 0              | <b>1</b>        | <b>2</b>       | 0              | 0             | 0              | <b>1</b>       | 0               | <b>na.</b>           | <b>ns.</b>  |
| chr15:20306549..26208861   | dupl              | rs8040193  | rs1635168      | 0                 | <b>6</b>       | 0               | 0              | 0               | 0              | 0              | 0             | 0              | 0              | 0               | na.                  | na.         |
| chr15:28723577..30302218   | del               | rs2046362  | rs4779984      | <b>1</b>          | <b>7</b>       | <b>1</b>        | 0              | <b>1</b>        | 0              | 0              | 0             | 0              | 0              | 0               | <b>8.9 (0.8-58)</b>  | <b>0.04</b> |
| chr15:47635303..47679448   | del               | rs1588127  | rs7176306      | 0                 | <b>94</b>      | 0               | 0              | 0               | 0              | 0              | 0             | 0              | 0              | 0               | na.                  | na.         |
| chr16:15032942..16197033   | del               | rs4985124  | rs8056397      | 0                 | <b>10</b>      | 0               | 0              | 0               | 0              | 0              | 0             | 0              | 0              | 0               | na.                  | na.         |
| chr16:15032942..16197033   | del               | rs4985124  | rs8056397      | 0                 | <b>10</b>      | 0               | 0              | 0               | 0              | 0              | 0             | 0              | 0              | 0               | na.                  | na.         |
| chr16:21515973..21647775   | del               | rs194548   | rs8050407      | <b>1</b>          | <b>31</b>      | 0               | 0              | 0               | 0              | 0              | 0             | 0              | 0              | 0               | <b>na.</b>           | <b>ns.</b>  |
| chr16:21515973..21647775   | del               | rs194548   | rs8050407      | <b>1</b>          | <b>31</b>      | 0               | 0              | 0               | 0              | 0              | 0             | 0              | 0              | 0               | <b>na.</b>           | <b>ns.</b>  |
| chr16:21856623..22331199   | del               | rs7498705  | rs12446433     | 0                 | <b>17</b>      | 0               | 0              | 0               | 0              | 0              | 0             | 0              | <b>1</b>       | 0               | <b>na.</b>           | <b>ns.</b>  |
| chr16:29563365..30085308   | del               | rs8054172  | rs7202714      | <b>1</b>          | <b>11</b>      | 0               | 0              | <b>1</b>        | 0              | 0              | 0             | 0              | 0              | 0               | <b>na.</b>           | <b>ns.</b>  |
| chr16:29563365..30085308   | del               | rs8054172  | rs7202714      | <b>1</b>          | <b>11</b>      | 0               | 0              | <b>1</b>        | 0              | 0              | 0             | 0              | 0              | 0               | <b>na.</b>           | <b>ns.</b>  |
| chr16:77757915..78273834   | del               | rs11150140 | rs7186420      | 0                 | <b>1</b>       | 0               | 0              | 0               | 0              | 0              | 0             | 0              | 0              | 0               | na.                  | na.         |
| chr16:81429793..81491808   | del               | rs9934411  | rs11150519     | 0                 | <b>1</b>       | 0               | 0              | 0               | 0              | 0              | 0             | 0              | 0              | 0               | na.                  | na.         |
| chr16:86921984..87097884   | del               | rs7500421  | rs868874       | 0                 | <b>1</b>       | 0               | 0              | 0               | 0              | 0              | 0             | 0              | 0              | 0               | na.                  | na.         |
| chr17:14041754..15390352   | del               | rs2856177  | rs2938171      | 0                 | <b>5</b>       | 0               | 0              | <b>1</b>        | 0              | 0              | <b>1</b>      | 0              | 0              | 0               | <b>na.</b>           | <b>ns.</b>  |
| chr17:15390352..20231611   | del               | rs2938171  | rs9909852      | 0                 | <b>1</b>       | 0               | 0              | 0               | 0              | 0              | 0             | 0              | 0              | 0               | na.                  | na.         |
| chr17:31889664..33323543   | dupl              | rs8067765  | rs306801       | 0                 | <b>11</b>      | 0               | 0              | 0               | 0              | 0              | 0             | 0              | 0              | 0               | na.                  | na.         |
| chr17:796976..1155912      | del               | rs4968132  | rs12936071     | 0                 | <b>1</b>       | 0               | 0              | 0               | 0              | 0              | 0             | 0              | 0              | 0               | na.                  | na.         |



|                           |      |            |            |   |    |   |   |   |   |   |   |   |   |   |   |     |     |
|---------------------------|------|------------|------------|---|----|---|---|---|---|---|---|---|---|---|---|-----|-----|
| chr17:9071043..9382978    | del  | rs3785991  | rs4239107  | 0 | 1  | 0 | 0 | 0 | 0 | 0 | 0 | 0 | 0 | 0 | 0 | na. | na. |
| chr18:75020837..75408356  | dupl | rs9954753  | rs383068   | 0 | 1  | 0 | 0 | 0 | 0 | 0 | 0 | 0 | 0 | 0 | 0 | na. | na. |
| chr19:20844764..20914290  | dupl | rs1465430  | rs10500214 | 0 | 6  | 0 | 0 | 0 | 0 | 0 | 0 | 0 | 0 | 0 | 0 | na. | na. |
| chr19:267040..1822341     | del  | rs7256434  | rs4807156  | 0 | 1  | 0 | 0 | 0 | 0 | 0 | 0 | 0 | 0 | 0 | 0 | na. | na. |
| chr19:54264641..54560863  | del  | rs3810185  | rs2303759  | 0 | 1  | 0 | 0 | 0 | 0 | 0 | 0 | 0 | 0 | 0 | 0 | na. | na. |
| chr2:19443..11594900      | dupl | rs4637157  | rs6758730  | 0 | 1  | 0 | 0 | 0 | 0 | 0 | 0 | 0 | 0 | 0 | 0 | na. | na. |
| chr2:197605805..204072966 | dupl | rs13426748 | rs2247380  | 0 | 1  | 0 | 0 | 0 | 0 | 0 | 0 | 0 | 0 | 0 | 0 | na. | na. |
| chr2:198783049..199060613 | del  | rs10170042 | rs4413156  | 0 | 1  | 0 | 0 | 0 | 0 | 0 | 0 | 0 | 0 | 0 | 0 | na. | na. |
| chr2:239980943..242692820 | del  | rs870790   | rs12469535 | 0 | 1  | 0 | 0 | 0 | 0 | 0 | 0 | 0 | 0 | 0 | 0 | na. | na. |
| chr2:50947040..51164471   | del  | rs11884918 | rs11896803 | 0 | 1  | 0 | 0 | 0 | 0 | 0 | 0 | 0 | 0 | 0 | 1 | na. | na. |
| chr2:95514686..97033113   | del  | rs10201845 | rs1256991  | 0 | 1  | 0 | 0 | 0 | 0 | 0 | 0 | 0 | 0 | 0 | 0 | na. | na. |
| chr20:14610721..14884935  | del  | rs1932954  | rs2423873  | 0 | 1  | 0 | 0 | 0 | 0 | 0 | 0 | 0 | 0 | 0 | 0 | na. | na. |
| chr20:14849776..15034277  | del  | rs2423846  | rs431587   | 0 | 22 | 0 | 0 | 0 | 0 | 0 | 0 | 0 | 1 | 0 | 0 | na. | na. |
| chr20:14849776..15034277  | del  | rs2423846  | rs431587   | 0 | 22 | 0 | 0 | 0 | 0 | 0 | 0 | 0 | 1 | 0 | 0 | na. | na. |
| chr20:14874333..15174767  | del  | rs173293   | rs6043152  | 0 | 5  | 0 | 0 | 0 | 0 | 0 | 0 | 0 | 0 | 0 | 0 | na. | na. |
| chr21:34846103..35391627  | dupl | rs2247891  | rs1006293  | 0 | 1  | 0 | 0 | 0 | 0 | 0 | 0 | 0 | 0 | 0 | 0 | na. | na. |
| chr22:17257787..17373128  | del  | rs2543958  | rs5993463  | 1 | 56 | 0 | 0 | 0 | 0 | 0 | 0 | 0 | 0 | 0 | 0 | na. | ns. |
| chr22:19063495..19792353  | del  | rs6003971  | rs140392   | 0 | 3  | 0 | 0 | 0 | 0 | 0 | 0 | 0 | 0 | 0 | 0 | na. | na. |
| chr22:21063401..21394287  | del  | rs6519260  | rs5996362  | 0 | 3  | 0 | 0 | 0 | 0 | 0 | 0 | 0 | 0 | 0 | 0 | na. | na. |
| chr3:174806420..176937369 | del  | rs10513715 | rs9858278  | 0 | 1  | 0 | 0 | 0 | 0 | 0 | 0 | 0 | 0 | 0 | 0 | na. | na. |
| chr3:197326041..197704191 | del  | rs7432894  | rs9858020  | 0 | 1  | 0 | 0 | 0 | 0 | 0 | 0 | 0 | 0 | 0 | 0 | na. | na. |
| chr3:71223511..71819797   | dupl | rs11128206 | rs3796226  | 0 | 1  | 0 | 0 | 0 | 0 | 0 | 0 | 0 | 0 | 0 | 0 | na. | na. |
| chr3:95019980..99373057   | del  | rs9681884  | rs10935259 | 0 | 1  | 0 | 0 | 0 | 0 | 0 | 0 | 0 | 0 | 0 | 0 | na. | na. |
| chr3:97879021..101883423  | del  | rs1386678  | rs1143781  | 0 | 1  | 0 | 0 | 0 | 0 | 0 | 0 | 0 | 0 | 0 | 0 | na. | na. |
| chr4:151856718..151884547 | del  | rs6535746  | rs1451634  | 0 | 4  | 0 | 0 | 0 | 0 | 0 | 0 | 0 | 0 | 0 | 0 | na. | na. |
| chr5:34603067..34668956   | del  | rs7736168  | rs408815   | 0 | 1  | 0 | 0 | 0 | 0 | 0 | 0 | 0 | 0 | 0 | 0 | na. | na. |
| chr5:58116787..72845587   | del  | rs446155   | rs2914544  | 0 | 1  | 0 | 0 | 0 | 0 | 0 | 0 | 0 | 0 | 0 | 0 | na. | na. |
| chr6:162767020..162943840 | del  | rs9456777  | rs7756486  | 0 | 35 | 0 | 0 | 0 | 0 | 0 | 0 | 0 | 0 | 0 | 0 | na. | na. |
| chr6:16699739..16803452   | del  | rs236981   | rs3812199  | 0 | 1  | 0 | 0 | 0 | 0 | 0 | 0 | 0 | 0 | 0 | 0 | na. | na. |
| chr7:146077700..147445123 | del  | rs6956550  | rs1859539  | 0 | 1  | 0 | 0 | 0 | 0 | 0 | 0 | 0 | 0 | 0 | 0 | na. | na. |
| chr7:149081..295765       | del  | rs7806592  | rs12718123 | 0 | 1  | 0 | 0 | 0 | 0 | 0 | 0 | 0 | 0 | 0 | 0 | na. | na. |
| chr7:15609872..16251148   | dupl | rs6946852  | rs1295164  | 0 | 1  | 0 | 0 | 0 | 0 | 0 | 0 | 0 | 0 | 0 | 0 | na. | na. |
| chr7:157553706..158812247 | del  | rs10949695 | rs1124425  | 0 | 1  | 0 | 0 | 0 | 0 | 0 | 0 | 0 | 0 | 0 | 0 | na. | na. |
| chr7:5050267..5190933     | del  | rs7458161  | rs6955907  | 0 | 1  | 0 | 0 | 0 | 0 | 0 | 0 | 0 | 0 | 0 | 0 | na. | na. |
| chr7:5229720..5653268     | dupl | rs13223581 | rs7780518  | 0 | 1  | 0 | 0 | 0 | 0 | 0 | 0 | 0 | 0 | 0 | 0 | na. | na. |

|                         |      |            |            |   |           |   |   |   |   |   |   |   |   |   |   |   |     |     |
|-------------------------|------|------------|------------|---|-----------|---|---|---|---|---|---|---|---|---|---|---|-----|-----|
| chr7:57212608..57659300 | dupl | rs13240443 | rs4870626  | 0 | <b>74</b> | 0 | 0 | 0 | 0 | 0 | 0 | 0 | 0 | 0 | 0 | 0 | na. | na. |
| chr7:72388281..73777987 | del  | rs1178970  | rs810364   | 0 | <b>1</b>  | 0 | 0 | 0 | 0 | 0 | 0 | 0 | 0 | 0 | 0 | 0 | na. | na. |
| chr7:83887393..85199723 | del  | rs1228960  | rs1533029  | 0 | <b>1</b>  | 0 | 0 | 0 | 0 | 0 | 0 | 0 | 0 | 0 | 0 | 0 | na. | na. |
| chr8:3931576..4252805   | del  | rs10503233 | rs10089026 | 0 | <b>1</b>  | 0 | 0 | 0 | 0 | 0 | 0 | 0 | 0 | 0 | 0 | 0 | na. | na. |
| chr9:194201..5739305    | del  | rs10964134 | rs4742122  | 0 | <b>1</b>  | 0 | 0 | 0 | 0 | 0 | 0 | 0 | 0 | 0 | 0 | 0 | na. | na. |

Four deletions, three on 16p and one on 20p, are observed twice *de novo* in our discovery sample, and listed in the table as duplicates. Locations are based on Build 36 of the human genome.

**Supplementary Table 4. Diagnosis, family history, age of onset, response to neuroleptics (based on available records) and learning ability in cases carrying the 1q21.1 deletion associating with schizophrenia.**

| Case ID     | Diagnosis        | Family history | Age of onset | Gender | Response | Other                                   |
|-------------|------------------|----------------|--------------|--------|----------|-----------------------------------------|
| Munich 1    | DSMIV:295.3      | Yes            | 24           | M      | Yes      | Aggressive, learning disability, not MR |
| Bonn 1*     | DSMIV:295.3      | No             | 33           | F      | Yes      | Not MR                                  |
| Bonn 2      | DSMIV:295.3      | No             | 16           | F      | Relapse  | Not MR, depressive symptoms             |
| Iceland 1   | RDC:126.3        | No             | 26           | F      | Yes      | Not MR                                  |
| Scotland 1  | DSMIV:295        | No             | 43           | F      | Yes      | Not MR                                  |
| Scotland 2* | DSMIV:295        | Yes            | 21           | M      | Yes      | Not MR                                  |
| Scotland 3* | DSMIV:295        | No             | 32           | M      | Yes      | Not MR, mother with low IQ              |
| Scotland 4* | DSMIV:295        | No             | 33           | F      | Yes      | Not MR, borderline learning disability  |
| Denmark 1   | DSMIV: 295       | Yes            | 24           | F      | Yes      | Not MR                                  |
| Denmark 2   | DSMIV: 295       | No             | 23           | M      | Yes      | Borderline mental retardation           |
| Denmark 3   | ICD10: Scz (F20) | No             | 20           | M      | No       | Not MR                                  |

\* There are two forms of the 1q21.1 deletion, long and short. Those marked with an asterisk in the table above have the larger form. MR=mentally retarded.

**Supplementary Table 5. Diagnosis, family history, age of onset, response to neuroleptics based on available records and learning ability in cases carrying the 15q11.2 deletion associating with schizophrenia and related psychoses.**

| Case ID    | Diagnosis     | Family history                                              | Age of onset | Gender | Response | Other                                              |
|------------|---------------|-------------------------------------------------------------|--------------|--------|----------|----------------------------------------------------|
| Munich 1   | DSMIV: 295    | Monozygotic twin brother with unknown psychiatric diagnosis | 24           | M      | Yes      | Not MR, very aggressive as child                   |
| Munich 2   | DSMIV: 295    | No                                                          | 25           | F      | Yes      | Not MR                                             |
| Munich 3   | DSMIV: 295    | Mother depression                                           | 32           | M      | Yes      | Not MR                                             |
| Munich 4   | DSMIV: 295    | No                                                          | 17           | M      | Yes      | Not MR                                             |
| Munich 5   | DSMIV: 295    | No                                                          | 23           | F      | Yes      | Not MR                                             |
| Bonn 1     | .             | .                                                           | .            | M      | .        | Not MR                                             |
| Iceland 1  | .             | No                                                          | 39           | M      | Yes      | Not MR                                             |
| Iceland 2  | .             | No                                                          | 29           | F      | Yes      | Not MR                                             |
| Iceland 3  | RDC: 126.3    | Yes, schizophrenia                                          | 33           | M      | Yes      | Not MR                                             |
| Iceland 4  | RDC: 126      | Yes, schizophrenia                                          | 16           | F      | Yes      | Not MR                                             |
| Scotland 1 | DSMIV: 295    | No                                                          | 37           | F      | Yes      | Not MR, borderline learning difficulties           |
| Scotland 2 | DSMIV: 295    | .                                                           | 23           | F      | Yes      | Not MR                                             |
| Scotland 3 | DSMIV: 295    | .                                                           | 32           | F      | Yes      | Not MR                                             |
| Scotland 4 | DSMIV: 295    | No                                                          | 22           | M      | Yes      | Not MR                                             |
| Scotland 5 | DSMIV: 295    | No                                                          | 31           | F      | Yes      | Not MR, nervous breakdown at 22                    |
| Scotland 6 | DSMIV: 295    | No                                                          | 15           | M      | Yes      | Not MR, heroin addiction                           |
| Scotland 7 | .             | Yes, schizophrenia                                          | 24           | F      | .        |                                                    |
| England 1  | .             | Yes, schizophrenia (co-twin)                                | 25           | M      | Yes      | Not MR, no drug abuse, primarily negative symptoms |
| Denmark 1  | ICD10: F20    | No                                                          | 26           | M      | No       | Not MR                                             |
| Denmark 2  | ICD10: F20    | No                                                          | 27           | M      | .        | Not MR                                             |
| Denmark 3  | ICD10: F20    | No                                                          | 21           | M      | .        | Not MR, cannabis abuse                             |
| Denmark 4  | ICD10: F25    | Yes                                                         | 16           | M      | Yes      | Not MR                                             |
| Holland 1  | DSMIV: 295.30 | .                                                           | 19           | F      | .        | Not MR                                             |

|           |               |    |    |   |   |        |
|-----------|---------------|----|----|---|---|--------|
| Holland 2 | DSMIV: 295.30 | No | 20 | M | . | Not MR |
| Holland 3 | DSMIV: 295.30 | No | 20 | M | . | Not MR |
| Holland 4 | DSMIV: 295.30 | .  | 22 | M | . | Not MR |

---

MR=mentally retarded.

---

**Supplementary Table 6. Diagnosis, family history, age of onset, response to neuroleptics based on available records and learning ability in cases carrying the 15q13.3 deletion associating with schizophrenia.**

---

| Case ID    | Diagnosis     | Family history | Age of onset | Gender | Response | Other          |
|------------|---------------|----------------|--------------|--------|----------|----------------|
| Munich 1   | DSMIV: 295    | Yes            | 24           | M      | Yes      | Not MR         |
| Iceland 1  | .             | Yes            | 30           | M      | Yes      | Not MR         |
| Scotland 1 | DSMIV: 295    | .              | 20           | M      | Yes      | Not MR , IQ 83 |
| Norway 1   | DSMIV: 295.4  | .              | 31           | F      | Yes      | Not MR         |
| Holland 1  | DSMIV: 295.20 | .              | 23           | M      | .        | Not MR         |
| Holland 2  | DSMIV: 295.30 | Yes            | 39           | F      | .        | Not MR         |
| Holland 3  | DSMIV: 295.30 | .              | .            | M      | .        | Not MR         |

---

MR=mentally retarded.

**Supplementary Table 7. Allelic association results for markers on the Illumina HumanHap300 within the 1q21.1 deletion.**

| Marker     | Allele | OR   | P-value | chr | Location (bp) | Gene              |
|------------|--------|------|---------|-----|---------------|-------------------|
| rs12406844 | C      | 1.14 | 0.0010  | 1   | 145436035     |                   |
| rs12141187 | C      | 1.13 | 0.0023  | 1   | 145449387     |                   |
| rs10465885 | C      | 1.12 | 0.0033  | 1   | 145699364     | GJA5              |
| rs6684174  | C      | 1.11 | 0.0067  | 1   | 145683484     |                   |
| rs2644577  | C      | 0.90 | 0.0075  | 1   | 145409110     |                   |
| rs4950437  | A      | 0.90 | 0.0076  | 1   | 145394019     | OR13Z2P           |
| rs952477   | A      | 1.10 | 0.0113  | 1   | 145716820     | GJA5              |
| rs10793705 | C      | 1.10 | 0.0150  | 1   | 145706931     | GJA5              |
| rs4132958  | C      | 1.09 | 0.0258  | 1   | 145430649     |                   |
| rs12755965 | C      | 0.92 | 0.0300  | 1   | 145658465     |                   |
| rs12022413 | A      | 0.92 | 0.0328  | 1   | 145463869     | BCL9              |
| rs613089   | C      | 1.09 | 0.0356  | 1   | 145547811     | BCL9              |
| rs4950322  | A      | 1.10 | 0.0372  | 1   | 145321460     |                   |
| rs10900321 | C      | 0.92 | 0.0431  | 1   | 145096540     | PRKAB2 LOC400780  |
| rs1342709  | C      | 1.08 | 0.0432  | 1   | 145744388     |                   |
| rs3766510  | A      | 0.89 | 0.0434  | 1   | 145596846     | ACP6              |
| rs4950361  | A      | 1.09 | 0.0472  | 1   | 145025789     | LOC441904         |
| rs2236570  | A      | 0.92 | 0.0495  | 1   | 145560511     | BCL9              |
| rs1932977  | A      | 0.92 | 0.0603  | 1   | 145155565     | FMO5              |
| rs11240007 | C      | 1.08 | 0.0662  | 1   | 145304073     |                   |
| rs945742   | A      | 0.93 | 0.0728  | 1   | 145251781     |                   |
| rs4950402  | G      | 1.08 | 0.0787  | 1   | 145258026     |                   |
| rs903786   | C      | 1.09 | 0.0839  | 1   | 145830625     | LOC391092 GJA8    |
| rs11240147 | A      | 1.13 | 0.0856  | 1   | 145824905     | LOC391092 GJA8    |
| rs10494251 | A      | 1.14 | 0.1012  | 1   | 145490518     | BCL9              |
| rs903784   | A      | 0.92 | 0.1020  | 1   | 145830723     | LOC391092 GJA8    |
| rs999095   | A      | 0.92 | 0.1048  | 1   | 145676851     |                   |
| rs11811023 | C      | 1.07 | 0.1075  | 1   | 145047742     | LOC440678         |
| rs21327    | C      | 1.07 | 0.1119  | 1   | 144995145     | LOC440677         |
| rs3820129  | A      | 1.06 | 0.1145  | 1   | 145558596     | BCL9              |
| rs11239984 | A      | 0.94 | 0.1174  | 1   | 145258353     |                   |
| rs1417279  | A      | 1.09 | 0.1212  | 1   | 145574517     | BCL9              |
| rs2883318  | G      | 1.06 | 0.1216  | 1   | 145315767     |                   |
| rs2353974  | A      | 1.06 | 0.1297  | 1   | 145322880     |                   |
| rs1932978  | C      | 0.95 | 0.1532  | 1   | 145194387     | CHD1L             |
| rs12408395 | A      | 1.07 | 0.1535  | 1   | 145372992     |                   |
| rs11239953 | T      | 1.06 | 0.1559  | 1   | 145184188     | CHD1L             |
| rs2275552  | C      | 1.06 | 0.1566  | 1   | 145598569     | ACP6              |
| rs647596   | G      | 1.05 | 0.1593  | 1   | 145002018     | LOC440677         |
| rs6593752  | C      | 1.06 | 0.1766  | 1   | 145196592     | CHD1L             |
| rs2353986  | C      | 0.95 | 0.1781  | 1   | 145288493     |                   |
| rs2077749  | A      | 1.05 | 0.1810  | 1   | 145119261     | PRKAB2 LOC400780  |
| rs11576760 | C      | 1.09 | 0.1956  | 1   | 145806592     | FMO5<br>LOC391092 |
| rs2353987  | G      | 0.95 | 0.2020  | 1   | 145294180     |                   |
| rs4950328  | C      | 1.05 | 0.2235  | 1   | 145471435     | BCL9              |
| rs2353544  | A      | 0.95 | 0.2365  | 1   | 145515224     | BCL9              |
| rs2353983  | C      | 1.04 | 0.2809  | 1   | 145279761     |                   |
| rs7541090  | C      | 1.04 | 0.3058  | 1   | 145353686     | OR13Z1P           |

|            |   |      |        |   |           |                  |
|------------|---|------|--------|---|-----------|------------------|
| rs627219   | G | 0.92 | 0.3068 | 1 | 145539979 | BCL9             |
| rs10900403 | G | 0.95 | 0.3305 | 1 | 145807358 |                  |
| rs2999613  | A | 1.06 | 0.3586 | 1 | 146286966 |                  |
| rs10494246 | A | 1.10 | 0.3592 | 1 | 145614928 | ACP6             |
| rs2354432  | A | 1.05 | 0.3811 | 1 | 145159853 | FMO5             |
| rs885239   | A | 0.95 | 0.3831 | 1 | 145594226 | ACP6             |
| rs1353431  | C | 0.94 | 0.3926 | 1 | 145764604 | LOC391092        |
| rs1390510  | A | 1.07 | 0.3975 | 1 | 145497947 | BCL9             |
| rs4950392  | G | 0.96 | 0.4064 | 1 | 145203172 | CHD1L            |
| rs10494245 | A | 1.04 | 0.4135 | 1 | 145637476 |                  |
| rs1853782  | C | 1.04 | 0.4300 | 1 | 144975398 | LOC440677        |
| rs4504949  | A | 1.06 | 0.4304 | 1 | 145368301 | OR13Z2P          |
| rs584323   | C | 0.97 | 0.4348 | 1 | 145442845 |                  |
| rs1541187  | A | 1.04 | 0.4534 | 1 | 145518117 | BCL9             |
| rs1572825  | A | 0.97 | 0.4567 | 1 | 145473996 | BCL9             |
| rs6664767  | G | 1.03 | 0.4681 | 1 | 145776067 | LOC391092        |
| rs1814653  | A | 0.96 | 0.4757 | 1 | 146209659 | LOC440679        |
|            |   |      |        |   |           | LOC388684        |
| rs894469   | A | 1.05 | 0.4853 | 1 | 145139530 | FMO5             |
| rs1015235  | A | 0.97 | 0.5032 | 1 | 145510166 | BCL9             |
| rs894467   | C | 0.94 | 0.5305 | 1 | 145128642 | PRKAB2 FMO5      |
| rs1908627  | C | 0.95 | 0.5319 | 1 | 145727389 | GJA5             |
| rs4950574  | A | 1.03 | 0.5358 | 1 | 146216845 | LOC440679        |
|            |   |      |        |   |           | LOC388684        |
| rs6937     | A | 0.97 | 0.5686 | 1 | 145093546 | PRKAB2           |
| rs946904   | C | 0.98 | 0.5768 | 1 | 145589455 | ACP6             |
| rs2992453  | A | 0.98 | 0.5966 | 1 | 146253348 | LOC440680        |
| rs596561   | C | 0.97 | 0.6110 | 1 | 145447612 |                  |
| rs1353428  | G | 0.98 | 0.6115 | 1 | 145792846 |                  |
| rs7526407  | C | 1.03 | 0.6163 | 1 | 145537233 | BCL9             |
| rs11804045 | A | 1.03 | 0.6551 | 1 | 145628401 | ACP6             |
| rs4950494  | A | 1.02 | 0.6672 | 1 | 145838200 | LOC391092 GJA8   |
| rs10494257 | A | 0.98 | 0.6923 | 1 | 145721193 | GJA5             |
| rs1495956  | C | 1.02 | 0.7095 | 1 | 145705110 | GJA5             |
| rs1344     | A | 1.01 | 0.7439 | 1 | 145585897 | ACP6             |
| rs12141387 | A | 1.01 | 0.7529 | 1 | 144970465 | LOC440677        |
| rs11261254 | C | 0.98 | 0.7631 | 1 | 146185099 |                  |
| rs10494243 | C | 1.03 | 0.7723 | 1 | 145146427 | FMO5             |
| rs6593746  | A | 1.03 | 0.8049 | 1 | 145153273 | FMO5             |
| rs2932454  | G | 1.01 | 0.8354 | 1 | 146293282 | FLJ39739 RNU1P10 |
| rs12061877 | C | 0.99 | 0.8369 | 1 | 145730876 | GJA5             |
| rs1763457  | C | 0.99 | 0.8455 | 1 | 146262302 | LOC440680        |
| rs7530962  | A | 1.01 | 0.8523 | 1 | 145614797 | ACP6             |
| rs2452     | A | 0.99 | 0.8609 | 1 | 145220003 | CHD1L            |
| rs6693109  | A | 1.01 | 0.8686 | 1 | 145287960 |                  |
| rs11240009 | A | 0.99 | 0.8697 | 1 | 145308966 |                  |
| rs9661159  | A | 0.99 | 0.8740 | 1 | 145224547 | CHD1L            |
| rs1001193  | C | 1.01 | 0.8784 | 1 | 145633001 |                  |
| rs1857208  | A | 1.01 | 0.9070 | 1 | 145758611 |                  |
| rs671205   | C | 1.00 | 0.9479 | 1 | 144989346 | LOC440677        |
| rs2000072  | A | 1.00 | 0.9581 | 1 | 145437192 |                  |

Significant association with SNP alleles was not found with schizophrenia after Bonferroni correction. Data from 2,687 cases and 13,484 controls were used in the association analysis. Locations are based on Build 36 of the human genome.



**Supplementary Table 8. Allelic association results for markers on the Illumina HumanHap300 within the 15q11.2 deletion.**

| Marker     | Allele | OR   | P-value | chr | Location (bp) | Gene            |
|------------|--------|------|---------|-----|---------------|-----------------|
| rs8029320  | A      | 1.17 | 0.0008  | 15  | 20437666      | CYFIP1          |
| rs1897786  | A      | 1.15 | 0.0061  | 15  | 20545323      | CYFIP1          |
| rs999842   | C      | 0.91 | 0.0163  | 15  | 20551713      | CYFIP1 NIPA2    |
| rs4778413  | C      | 1.09 | 0.0507  | 15  | 20560833      | NIPA2 CYFIP1    |
| rs6606817  | C      | 1.08 | 0.0647  | 15  | 20567999      | NIPA2           |
| rs4778370  | C      | 0.91 | 0.0764  | 15  | 20578289      | NIPA2           |
| rs8034210  | C      | 0.93 | 0.0810  | 15  | 20347960      |                 |
| rs12911925 | C      | 1.10 | 0.0917  | 15  | 20568493      | NIPA2           |
| rs4778334  | A      | 0.93 | 0.1100  | 15  | 20592297      |                 |
| rs7168000  | G      | 1.08 | 0.1283  | 15  | 20564567      | CYFIP1 NIPA2    |
| rs7170838  | C      | 0.93 | 0.1334  | 15  | 20572679      | NIPA2           |
| rs4778464  | A      | 0.93 | 0.1518  | 15  | 20537129      | CYFIP1          |
| rs2289819  | C      | 0.93 | 0.1522  | 15  | 20512379      | CYFIP1          |
| rs4778575  | T      | 0.95 | 0.2031  | 15  | 20605280      | NIPA2 NIPA1     |
| rs1009153  | C      | 0.95 | 0.2039  | 15  | 20528352      | CYFIP1          |
| rs4293342  | C      | 1.05 | 0.2069  | 15  | 20455753      | CYFIP1          |
| rs1991922  | C      | 0.92 | 0.2168  | 15  | 20610835      | NIPA1           |
| rs12594495 | A      | 1.05 | 0.2193  | 15  | 20499445      | CYFIP1          |
| rs7181789  | A      | 0.96 | 0.2454  | 15  | 20595337      | NIPA2 NIPA1     |
| rs12441373 | A      | 1.13 | 0.2619  | 15  | 20541359      | CYFIP1          |
| rs2289824  | C      | 0.94 | 0.2680  | 15  | 20477670      | CYFIP1          |
| rs2028794  | A      | 0.96 | 0.2818  | 15  | 20470856      | CYFIP1          |
| rs2278458  | A      | 0.90 | 0.3075  | 15  | 20551298      | CYFIP1 NIPA2    |
| rs8031642  | C      | 1.04 | 0.3118  | 15  | 20351272      | LOC390544       |
| rs3693     | A      | 1.04 | 0.3290  | 15  | 20556334      | CYFIP1 NIPA2    |
| rs2289815  | G      | 0.96 | 0.3483  | 15  | 20421301      | TUBGCP5         |
| rs4778470  | C      | 0.96 | 0.3797  | 15  | 20523005      | CYFIP1          |
| rs7167658  | C      | 1.04 | 0.4210  | 15  | 20460862      | CYFIP1          |
| rs1347314  | C      | 0.94 | 0.4450  | 15  | 20585443      | NIPA2 NIPA1     |
| rs7168367  | C      | 1.04 | 0.4805  | 15  | 20618177      | NIPA1           |
| rs5006363  | A      | 0.95 | 0.4848  | 15  | 20398953      | TUBGCP5         |
| rs722410   | A      | 1.03 | 0.4896  | 15  | 20475538      | CYFIP1          |
| rs765763   | C      | 0.97 | 0.5022  | 15  | 20428330      | TUBGCP5 CYFIP1  |
| rs6606825  | A      | 1.04 | 0.5038  | 15  | 20614243      | NIPA1           |
| rs4932679  | C      | 1.03 | 0.5296  | 15  | 20322108      | LOC390544       |
| rs2289823  | A      | 0.97 | 0.5390  | 15  | 20479393      | CYFIP1          |
| rs956120   | C      | 1.02 | 0.5545  | 15  | 20489279      | CYFIP1          |
| rs4592619  | C      | 0.97 | 0.5620  | 15  | 20585244      | NIPA2 NIPA1     |
| rs8040193  | C      | 1.05 | 0.6146  | 15  | 20306549      | LOC390544       |
| rs7182576  | G      | 0.98 | 0.6284  | 15  | 20546036      | CYFIP1          |
| rs1579821  | C      | 1.02 | 0.6338  | 15  | 20501269      | CYFIP1          |
| rs3812924  | A      | 1.02 | 0.6381  | 15  | 20599983      | NIPA2 NIPA1     |
| rs3751566  | C      | 0.98 | 0.6918  | 15  | 20492111      | CYFIP1          |
| rs2304341  | C      | 0.97 | 0.7614  | 15  | 20542471      | CYFIP1          |
| rs722411   | A      | 1.01 | 0.7741  | 15  | 20475585      | CYFIP1          |
| rs7174982  | C      | 1.01 | 0.8269  | 15  | 20517099      | CYFIP1          |
| rs7168653  | C      | 0.99 | 0.8308  | 15  | 20516088      | CYFIP1          |
| rs3883043  | A      | 1.01 | 0.8321  | 15  | 20777695      | LOC339005       |
| rs11636068 | A      | 0.99 | 0.8639  | 15  | 20629449      | NIPA1 LOC400320 |

|            |   |      |        |    |          |                 |
|------------|---|------|--------|----|----------|-----------------|
| rs8043036  | A | 1.00 | 0.9396 | 15 | 20434983 | CYFIP1          |
| rs1544285  | A | 1.00 | 0.9665 | 15 | 20405438 | TUBGCP5         |
| rs4778298  | A | 1.00 | 0.9740 | 15 | 20505022 | CYFIP1          |
| rs11263687 | G | 1.00 | 0.9838 | 15 | 20635884 | LOC400320 NIPA1 |
| rs2289816  | G | 1.00 | 0.9906 | 15 | 20506454 | CYFIP1          |

---

Significant association with SNP alleles was not found with schizophrenia after Bonferroni correction. Data from 2,687 cases and 13,484 controls were used in the association analysis. Locations are based on Build 36 of the human genome.

**Supplementary Table 9. Allelic association results for markers on the Illumina HumanHap300 within the 15q13.3 deletion.**

| Marker     | Allele | OR   | P-value | chr | Location (bp) | Gene               |
|------------|--------|------|---------|-----|---------------|--------------------|
| rs1463408  | A      | 0.88 | 0.0055  | 15  | 29243936      |                    |
| rs12915265 | C      | 0.89 | 0.0089  | 15  | 30196358      | CHRNA7             |
| rs8038654  | C      | 0.83 | 0.0095  | 15  | 30072156      |                    |
| rs10438342 | A      | 0.91 | 0.0169  | 15  | 30189338      |                    |
| rs4779824  | C      | 0.91 | 0.0174  | 15  | 29191586      | TRPM1              |
| rs1223889  | A      | 0.92 | 0.0243  | 15  | 29258764      |                    |
| rs2241494  | A      | 0.92 | 0.0301  | 15  | 29155896      | TRPM1              |
| rs10152238 | A      | 1.15 | 0.0377  | 15  | 30057610      |                    |
| rs1647992  | A      | 0.91 | 0.0459  | 15  | 29245430      |                    |
| rs4779984  | A      | 0.89 | 0.0520  | 15  | 30302218      |                    |
| rs1863279  | A      | 1.08 | 0.0530  | 15  | 29282405      |                    |
| rs1477534  | A      | 0.93 | 0.0539  | 15  | 29271979      |                    |
| rs4779536  | A      | 1.08 | 0.0598  | 15  | 29574400      | C15orf16           |
| rs2651418  | A      | 0.93 | 0.0642  | 15  | 30226573      | CHRNA7             |
| rs999876   | A      | 0.93 | 0.0642  | 15  | 29272626      |                    |
| rs7173280  | C      | 0.93 | 0.0759  | 15  | 29128656      | TRPM1              |
| rs1035706  | A      | 1.10 | 0.0795  | 15  | 29130377      | TRPM1              |
| rs1978801  | A      | 0.94 | 0.0880  | 15  | 29294328      | LOC283710          |
| rs919001   | A      | 1.07 | 0.0893  | 15  | 29144430      | TRPM1              |
| rs6493543  | G      | 0.94 | 0.0923  | 15  | 29324788      | LOC283710          |
| rs8042511  | A      | 1.16 | 0.0971  | 15  | 29222034      |                    |
| rs803534   | C      | 0.94 | 0.1062  | 15  | 29215548      |                    |
| rs6493688  | A      | 0.94 | 0.1139  | 15  | 29560167      | LOC400347 C15orf16 |
| rs4779937  | C      | 1.06 | 0.1178  | 15  | 29975287      |                    |
| rs7162289  | C      | 1.08 | 0.1310  | 15  | 29373158      |                    |
| rs1672407  | C      | 1.06 | 0.1344  | 15  | 29227096      |                    |
| rs12442141 | C      | 1.16 | 0.1345  | 15  | 29266578      |                    |
| rs1672409  | A      | 0.95 | 0.1446  | 15  | 29228600      |                    |
| rs1001555  | A      | 1.12 | 0.1452  | 15  | 30060958      |                    |
| rs1514254  | A      | 0.94 | 0.1456  | 15  | 29998226      |                    |
| rs1465778  | C      | 1.06 | 0.1460  | 15  | 29408613      | KLF13              |
| rs1580141  | A      | 1.05 | 0.1981  | 15  | 29232062      |                    |
| rs3784595  | A      | 1.07 | 0.2043  | 15  | 29129507      | TRPM1              |
| rs6493540  | A      | 1.05 | 0.2115  | 15  | 29321882      | LOC283710          |
| rs1465779  | C      | 1.07 | 0.2226  | 15  | 29397182      | KLF13              |
| rs1865873  | C      | 1.05 | 0.2226  | 15  | 29303300      | LOC283710          |
| rs2278133  | A      | 1.05 | 0.2238  | 15  | 29140680      | TRPM1              |
| rs8034505  | A      | 1.05 | 0.2270  | 15  | 29460239      | KLF13 LOC440262    |
| rs2241493  | C      | 1.06 | 0.2295  | 15  | 29149644      | TRPM1              |
| rs8035668  | A      | 0.94 | 0.2296  | 15  | 30178638      | CHRNA7             |
| rs2879262  | C      | 0.95 | 0.2459  | 15  | 29344873      |                    |
| rs4417522  | C      | 1.04 | 0.2735  | 15  | 29974412      |                    |
| rs7179733  | C      | 0.96 | 0.2814  | 15  | 30160985      | CHRNA7             |
| rs1459200  | A      | 1.04 | 0.2991  | 15  | 29594877      | C15orf16           |
| rs2288242  | A      | 1.05 | 0.3062  | 15  | 29117572      | TRPM1              |
| rs2338834  | C      | 1.04 | 0.3069  | 15  | 29125017      | TRPM1              |
| rs890158   | C      | 1.04 | 0.3097  | 15  | 29157929      | TRPM1              |
| rs12900301 | C      | 0.95 | 0.3122  | 15  | 29619936      | C15orf16           |
| rs1503004  | A      | 1.06 | 0.3286  | 15  | 29827425      |                    |

|            |   |      |        |    |          |                        |
|------------|---|------|--------|----|----------|------------------------|
| rs3964705  | C | 0.96 | 0.3343 | 15 | 28822861 | LOC440261              |
| rs6494039  | C | 1.07 | 0.3401 | 15 | 29979194 |                        |
| rs12440180 | C | 1.04 | 0.3677 | 15 | 30072148 |                        |
| rs1606659  | A | 0.96 | 0.3731 | 15 | 30119745 | CHRNA7                 |
| rs4779939  | C | 0.95 | 0.3764 | 15 | 29985165 |                        |
| rs4779814  | C | 0.97 | 0.3814 | 15 | 29143717 | TRPM1                  |
| rs7169523  | A | 0.96 | 0.3831 | 15 | 29250670 |                        |
| rs2137856  | A | 0.97 | 0.3882 | 15 | 30016646 |                        |
| rs7163696  | C | 0.96 | 0.3902 | 15 | 29313681 | LOC283710              |
| rs11630449 | C | 0.96 | 0.3953 | 15 | 29402033 | KLF13                  |
| rs7163763  | A | 0.94 | 0.3977 | 15 | 29609507 | C15orf16               |
| rs953326   | C | 1.03 | 0.4090 | 15 | 30004979 |                        |
| rs3784601  | C | 0.96 | 0.4097 | 15 | 29180766 | TRPM1                  |
| rs3096464  | C | 1.03 | 0.4122 | 15 | 29256215 |                        |
| rs898212   | G | 1.03 | 0.4134 | 15 | 29579128 | C15orf16               |
| rs4779862  | C | 1.03 | 0.4200 | 15 | 29420453 | KLF13                  |
| rs4779759  | A | 1.03 | 0.4212 | 15 | 28751864 |                        |
| rs1456212  | A | 1.05 | 0.4215 | 15 | 29211346 |                        |
| rs3743234  | A | 1.03 | 0.4329 | 15 | 29126965 | TRPM1                  |
| rs1459198  | A | 1.03 | 0.4337 | 15 | 29649740 | C15orf16               |
| rs12901022 | C | 0.97 | 0.4341 | 15 | 29100035 | TRPM1                  |
| rs11638348 | A | 1.03 | 0.4352 | 15 | 29714219 | C15orf16               |
| rs1524878  | G | 1.03 | 0.4370 | 15 | 28941992 |                        |
| rs2125615  | A | 1.03 | 0.4493 | 15 | 29587441 | C15orf16               |
| rs2046362  | C | 0.97 | 0.4581 | 15 | 28723577 |                        |
| rs8041717  | G | 1.03 | 0.4719 | 15 | 29063737 | FLJ20313               |
| rs4779816  | A | 0.97 | 0.4730 | 15 | 29156415 | TRPM1                  |
| rs3865090  | C | 1.06 | 0.4734 | 15 | 29319602 | LOC283710              |
| rs8026705  | A | 0.97 | 0.4835 | 15 | 29704566 | C15orf16               |
| rs16956362 | A | 1.07 | 0.4848 | 15 | 28986264 | KIAA1018               |
| rs12439925 | C | 1.03 | 0.4852 | 15 | 29386793 | KLF13                  |
| rs971330   | C | 1.03 | 0.4885 | 15 | 29538956 | LOC400347              |
| rs7174744  | A | 0.97 | 0.4961 | 15 | 28971039 | KIAA1018<br> LOC388104 |
| rs12442622 | A | 1.03 | 0.4971 | 15 | 30045195 |                        |
| rs11071179 | C | 0.97 | 0.4975 | 15 | 29635750 | C15orf16               |
| rs7175258  | A | 1.04 | 0.5180 | 15 | 29484934 | LOC440262              |
| rs2337980  | C | 0.98 | 0.5194 | 15 | 30231488 | CHRNA7                 |
| rs10519712 | A | 1.03 | 0.5230 | 15 | 29997162 |                        |
| rs4779889  | G | 1.03 | 0.5245 | 15 | 29601495 | C15orf16               |
| rs7169662  | A | 0.98 | 0.5292 | 15 | 29438608 | KLF13                  |
| rs11632955 | C | 0.98 | 0.5400 | 15 | 29336409 |                        |
| rs9672615  | A | 1.03 | 0.5436 | 15 | 30298847 |                        |
| rs8025698  | C | 1.02 | 0.5444 | 15 | 29186010 | TRPM1                  |
| rs7175507  | C | 1.02 | 0.5606 | 15 | 30007740 |                        |
| rs6493623  | A | 1.03 | 0.5622 | 15 | 29444540 | KLF13                  |
| rs4779809  | C | 0.98 | 0.5771 | 15 | 29131323 | TRPM1                  |
| rs12439621 | C | 1.05 | 0.5937 | 15 | 30096476 | CHRNA7                 |
| rs12442954 | A | 0.98 | 0.5955 | 15 | 30029658 |                        |
| rs1060493  | G | 1.02 | 0.6020 | 15 | 29303762 | LOC283710              |
| rs7402321  | C | 1.02 | 0.6061 | 15 | 30207700 | CHRNA7                 |
| rs16956762 | A | 0.98 | 0.6140 | 15 | 29539275 | LOC400347              |
| rs964925   | C | 1.02 | 0.6145 | 15 | 29093271 | TRPM1                  |
| rs2337233  | C | 0.98 | 0.6206 | 15 | 30094507 | CHRNA7                 |
| rs7182946  | G | 0.98 | 0.6232 | 15 | 29182160 | TRPM1                  |
| rs7178760  | C | 0.97 | 0.6243 | 15 | 29318665 | LOC283710              |
| rs17228178 | C | 0.98 | 0.6295 | 15 | 29257220 |                        |
| rs6493352  | C | 1.02 | 0.6331 | 15 | 29021356 | FLJ20313 KIAA1018      |

|            |   |      |        |    |          |                         |
|------------|---|------|--------|----|----------|-------------------------|
| rs11070871 | C | 0.97 | 0.6503 | 15 | 29299944 | LOC283710               |
| rs11636101 | A | 0.98 | 0.6721 | 15 | 30061449 |                         |
| rs1524876  | C | 0.98 | 0.6726 | 15 | 29050564 | FLJ20313                |
| rs4779948  | C | 0.98 | 0.6730 | 15 | 30046352 |                         |
| rs8042404  | A | 0.98 | 0.6904 | 15 | 29467308 | KLF13 LOC440262         |
| rs2113945  | C | 0.98 | 0.6905 | 15 | 29111823 | TRPM1                   |
| rs7174211  | A | 0.98 | 0.6930 | 15 | 29425288 | KLF13                   |
| rs1474380  | A | 0.98 | 0.6997 | 15 | 29056527 | FLJ20313                |
| rs2338679  | A | 0.99 | 0.7029 | 15 | 29608133 | C15orf16                |
| rs13329490 | A | 1.02 | 0.7102 | 15 | 30195523 | CHRNA7                  |
| rs4321165  | A | 0.98 | 0.7117 | 15 | 29863575 | LOC440263               |
| rs12323980 | C | 0.97 | 0.7147 | 15 | 29363969 |                         |
| rs4238558  | A | 0.99 | 0.7193 | 15 | 29933027 |                         |
| rs11636160 | C | 0.98 | 0.7239 | 15 | 29489142 | LOC440262               |
| rs4268714  | A | 0.99 | 0.7304 | 15 | 29462745 | KLF13 LOC440262         |
| rs965435   | C | 1.02 | 0.7400 | 15 | 30104501 | CHRNA7                  |
| rs7167632  | A | 1.01 | 0.7425 | 15 | 29935438 |                         |
| rs4779520  | C | 0.99 | 0.7456 | 15 | 29452735 | KLF13                   |
| rs8028220  | A | 1.01 | 0.7461 | 15 | 29214684 |                         |
| rs12441324 | A | 1.01 | 0.7535 | 15 | 28830254 | LOC440261               |
| rs7182547  | C | 1.01 | 0.7558 | 15 | 29084964 | FLJ20313 TRPM1          |
| rs9302175  | C | 0.99 | 0.7596 | 15 | 29530870 | LOC400347               |
| rs2289126  | G | 0.99 | 0.7710 | 15 | 29308957 | LOC283710               |
| rs798081   | A | 0.98 | 0.7775 | 15 | 28910527 | LOC390561               |
| rs2611605  | C | 0.99 | 0.7856 | 15 | 30228925 | CHRNA7                  |
| rs11070619 | C | 1.02 | 0.7926 | 15 | 28896081 | LOC390561               |
| rs753636   | A | 0.98 | 0.7935 | 15 | 29478345 | LOC440262               |
| rs1514260  | A | 1.01 | 0.7981 | 15 | 30086242 |                         |
| rs1567885  | A | 1.01 | 0.8297 | 15 | 30088094 |                         |
| rs2063722  | A | 0.99 | 0.8311 | 15 | 30083665 |                         |
| rs10519688 | C | 0.99 | 0.8362 | 15 | 29921270 |                         |
| rs10519726 | A | 0.99 | 0.8404 | 15 | 29109167 | TRPM1                   |
| rs12594231 | C | 0.99 | 0.8540 | 15 | 29963596 |                         |
| rs17816055 | C | 1.01 | 0.8543 | 15 | 29619386 | C15orf16                |
| rs4779527  | C | 1.01 | 0.8566 | 15 | 29523383 | LOC440262<br> LOC400347 |
| rs1524877  | C | 0.99 | 0.8618 | 15 | 29058472 | FLJ20313                |
| rs2293314  | A | 0.99 | 0.8680 | 15 | 28997943 | KIAA1018                |
| rs1035707  | C | 1.01 | 0.8721 | 15 | 29172089 | TRPM1                   |
| rs2081455  | C | 0.99 | 0.8741 | 15 | 29210624 |                         |
| rs6493741  | C | 1.01 | 0.8747 | 15 | 29609127 | C15orf16                |
| rs11638086 | A | 0.99 | 0.8765 | 15 | 28853522 | LOC440261<br> LOC390561 |
| rs9672180  | C | 1.01 | 0.8818 | 15 | 30300468 |                         |
| rs1088475  | C | 1.01 | 0.8880 | 15 | 28927992 | LOC390561               |
| rs2219507  | A | 1.01 | 0.8928 | 15 | 29646927 | C15orf16                |
| rs2873     | A | 1.00 | 0.9116 | 15 | 29018547 | FLJ20313 KIAA1018       |
| rs2339046  | A | 1.01 | 0.9146 | 15 | 29059962 | FLJ20313                |
| rs798104   | C | 1.01 | 0.9313 | 15 | 28894118 | LOC390561               |
| rs3784589  | A | 0.99 | 0.9331 | 15 | 29082006 | FLJ20313 TRPM1          |
| rs8027035  | C | 1.01 | 0.9334 | 15 | 30149996 | CHRNA7                  |
| rs1392808  | G | 1.00 | 0.9471 | 15 | 30198807 | CHRNA7                  |
| rs4779556  | C | 1.00 | 0.9564 | 15 | 29960537 |                         |
| rs4779910  | C | 1.00 | 0.9612 | 15 | 29734334 | C15orf16                |
| rs1075232  | A | 1.00 | 0.9619 | 15 | 29528508 | LOC400347               |
| rs1378847  | C | 1.00 | 0.9674 | 15 | 29234640 |                         |
| rs12898600 | A | 1.00 | 0.9694 | 15 | 29816985 |                         |
| rs6494223  | C | 1.00 | 0.9697 | 15 | 30183749 | CHRNA7                  |

|           |   |      |        |    |          |          |
|-----------|---|------|--------|----|----------|----------|
| rs1983459 | A | 1.00 | 0.9703 | 15 | 28996041 | KIAA1018 |
| rs7178637 | C | 1.00 | 0.9774 | 15 | 29665644 | C15orf16 |
| rs4779794 | A | 1.00 | 0.9844 | 15 | 28984856 | KIAA1018 |
| rs905426  | A | 1.00 | 0.9955 | 15 | 29870041 |          |

Significant association with SNP alleles was not found with schizophrenia after Bonferroni correction. Data from 2,687 cases and 13,484 controls were used in the association analysis. Locations are based on Build 36 of the human genome.

## References

1. Spitzer, R.L., Endicott, J. & Robins, E. Research diagnostic criteria: rationale and reliability. *Arch Gen Psychiatry* **35**, 773-82 (1978).
2. Spitzer R , E.J. *The schedule for affective disorders and schizophrenia, lifetime version*, (New York State Psychiatric Institute, New York., 1977).
3. *Diagnostic and statistical manual of mental disorders, fourth edition (DSM-IV)*, (American Psychiatric Press, Inc, Washington DC, 1994).
4. Rosa, A. et al. Further evidence that congenital dermatoglyphic abnormalities are associated with psychosis: a twin study. *Schizophr Bull* **28**, 697-701 (2002).
5. Touloupoulou, T., Rabe-Hesketh, S., King, H., Murray, R.M. & Morris, R.G. Episodic memory in schizophrenic patients and their relatives. *Schizophr Res* **63**, 261-71 (2003).
6. *Schedules for Clinical Assessment in Neuropsychiatry (SCAN) Manual* (World Health Organization, 1994).
7. First M, S.R., Gibbon M, Williams J. *Structured Clinical Interview for Axis I DSM-IV Disorders*, (Biometrics Research, New York, 1994).
8. McGuffin, P., Farmer, A. & Harvey, I. A polydiagnostic application of operational criteria in studies of psychotic illness. Development and reliability of the OPCRIT system. *Arch Gen Psychiatry* **48**, 764-70 (1991).

9. Iafrate, A.J. et al. Detection of large-scale variation in the human genome. *Nat Genet* **36**, 949-51 (2004).
10. Tuzun, E. et al. Fine-scale structural variation of the human genome. *Nat Genet* **37**, 727-32 (2005).
11. Redon, R. et al. Global variation in copy number in the human genome. *Nature* **444**, 444-54 (2006).
12. Locke, D.P. et al. Linkage disequilibrium and heritability of copy-number polymorphisms within duplicated regions of the human genome. *Am J Hum Genet* **79**, 275-90 (2006).
13. McCarroll, S.A. et al. Common deletion polymorphisms in the human genome. *Nat Genet* **38**, 86-92 (2006).
